# Supplementary material for: Correction: Profiling subcellular localization of nuclear-encoded mitochondrial gene products in zebrafish
Source: PubMed Central journal article supplement (PMC10862497; doi:10.26508/lsa.202402628), 2024-02-12
Supplement: LSA-2024-02628_review_history.pdf [file LSA-2024-02628_review_history.pdf]

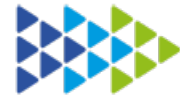

Life Science Alliance

# Correction: Profiling subcellular localization of nuclear-encoded mitochondrial gene products in zeb

Barbara Uszczyńska Ratajczak, Sreedevi Sugunan, Monika Kwiatkowska, Maciej Migdal, Silvia Carbonell-Sala, Anna Sokol, Cecilia Winata, and Agnieszka Chacinska

DOI: <https://doi.org/10.26508/lsa.202402628>

*Corresponding author(s): Cecilia Winata, International Institute of Molecular and Cell Biology in Warsaw, Poland and Agnieszka Chacinska, The International Institute of Molecular Mechanisms and Machines Polish Academy of Sciences*

---

## Review Timeline:

Submission Date:

2024-01-29

Accepted:

2024-02-06

---

*Scientific Editor: Eric Sawey, PhD*

## Transaction Report:

(Note: With the exception of the correction of typographical or spelling errors that could be a source of ambiguity, letters and reports are not edited. The original formatting of letters and referee reports may not be reflected in this compilation.)

February 6, 2024

RE: Life Science Alliance Manuscript #LSA-2024-02628

Dr. Cecilia Lanny Winata  
International Institute of Molecular and Cell Biology in Warsaw, Poland  
4 Ks. Trojdena  
Warsaw, Mazowieckie 02-109  
Poland

Dear Dr. Winata,

Thank you for submitting your Correction entitled "Correction: Profiling subcellular localization of nuclear-encoded mitochondrial gene products in zeb".

Your manuscript will now progress through copyediting and proofing.

**\*\*\*IMPORTANT: If you will be unreachable at any time, please provide us with the email address of an alternate author. Failure to respond to routine queries may lead to unavoidable delays in publication.\*\*\***

You can contact the journal office with any questions, [contact@life-science-alliance.org](mailto:contact@life-science-alliance.org)

Sincerely,

Eric Sawey, PhD  
Executive Editor  
Life Science Alliance  
<http://www.lsajournal.org>

February 6, 2024

RE: Life Science Alliance Manuscript #LSA-2024-02628

Dr. Cecilia Lanny Winata  
International Institute of Molecular and Cell Biology in Warsaw, Poland  
4 Ks. Trojdena  
Warsaw, Mazowieckie 02-109  
Poland

Dear Dr. Winata,

Thank you for submitting your Correction entitled "Correction: Profiling subcellular localization of nuclear-encoded mitochondrial gene products in zeb".

Your manuscript will now progress through copyediting and proofing.

\*\*\*IMPORTANT: If you will be unreachable at any time, please provide us with the email address of an alternate author. Failure to respond to routine queries may lead to unavoidable delays in publication.\*\*\*

You can contact the journal office with any questions, [contact@life-science-alliance.org](mailto:contact@life-science-alliance.org)

Sincerely,

Eric Sawey, PhD  
Executive Editor  
Life Science Alliance  
<http://www.lsajournal.org>
